# Supplementary material for: High-Temperature-Induced Shape Memory Copolyimide
Source: MDPI journal article supplement (doi:10.3390/polym13193222), 2021-09-23
Supplement: s1 [file s1]

# Supplementary Information

High-temperature-induced Shape Memory  
Copolyimide

*Supplementary information*

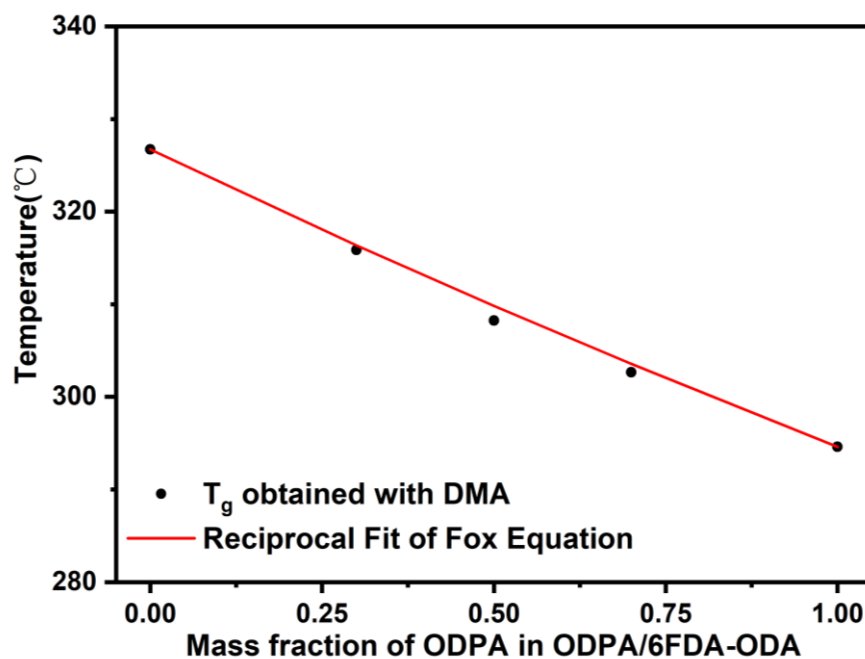

**Figure S1.**  $T_g$  of PI films of different copolymerization systems. The red line is calculated according to the Fox equation. The points are tested by DMA.

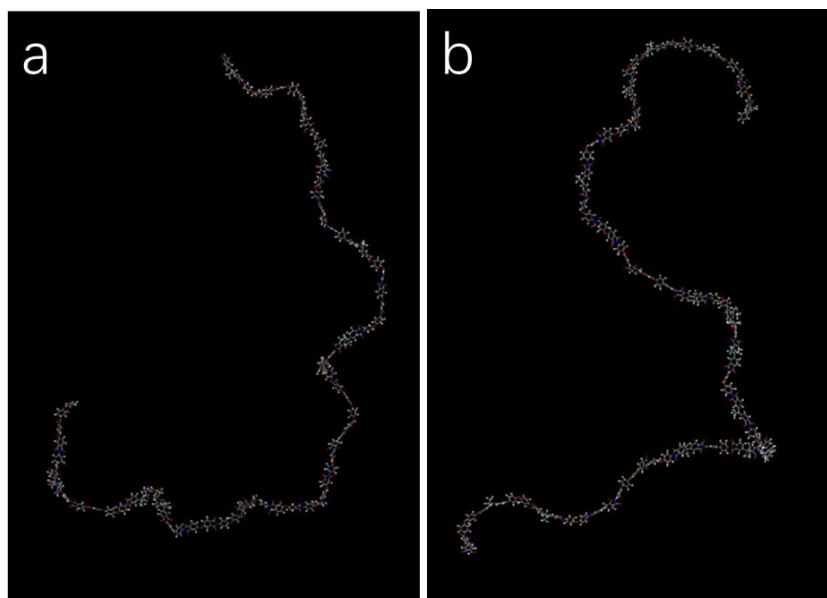

**Figure S2** 3D illustration of molecular structures of shape memory polyimide (a) 6FDA/ODPA-ODA-55 (b) 6FDA/ODPA-ODA-73.

**Table S1** The  $R_f$  and  $R_r$  data in shape memory cycles (in Figure. 6)

| Sample           | Cycle | $R_f$ (%) | $R_r$ (%) |
|------------------|-------|-----------|-----------|
| 6FDA/ODPA-ODA-73 | 1st   | 97.91     | 93.55     |
|                  | 2nd   | 98.09     | 95.28     |
|                  | 3rd   | 98.17     | 96.51     |
|                  | 4th   | 98.19     | 97.21     |
| 6FDA/ODPA-ODA-55 | 1st   | 98.53     | 90.95     |
|                  | 2nd   | 98.73     | 95.23     |
|                  | 3rd   | 98.78     | 96.38     |
|                  | 4th   | 98.85     | 97.01     |
| 6FDA/ODPA-ODA-37 | 1st   | 98.71     | 93.68     |
|                  | 2nd   | 98.81     | 96.77     |
|                  | 3rd   | 98.85     | 97.52     |
|                  | 4th   | 98.88     | 98.04     |
